# Supplementary material for: Evidence of a Bacterial Receptor for Lysozyme: Binding of Lysozyme to the Anti-σ Factor RsiV Controls Activation of the ECF σ Factor σV
Source: PubMed Central journal article supplement (PMC4183432; doi:10.1371/journal.pgen.1004643), 2014-10-02

**A.**

```

B. subtilis RsiV      ----MDKRLQQQLREEYKNVQIPKELDIIVEKALQQ---EPKKKRIVMWPT 43
C. difficile RsiV    --MTSKERLNKLNKDEYHKIPIPKKLDTIINHEKIENIYREKNKKVNRLRF 48
E. faecalis RsiV    MEDFVKSVVKNFNSKEYRQQPLPTDLQAEVKARFHKEKKRYTWLRFNRSL 50
    .. ::: .**:: :*..*:: :: : . . :.

B. subtilis RsiV      SAAIAAAAILFTALVNIINPDAAQA MSKIPVIGKIVKAITFIEIKEEKDQSS 93
C. difficile RsiV    KVAIAFACIFTVLVNISPVFA DNFSKIPVIGAIVEVITIKNYSLKSENYE 98
E. faecalis RsiV    QSSLVVACGFVLSVNLFPGFSEAA RNIPVLDKIVQLVTIKTLTAKKQESE 100
    . :. . * * . ** : * :***. . ** : * : . :. :.

B. subtilis RsiV      IDVKTPALSGLSNKELENSINEKYLKESQQLYKEFIQSTSKNK----KGH 139
C. difficile RsiV    AEIDIPKIRGLKDKNLEQRLNSSFMEDGKRLYHQFQERMEKIQSSKNKGY 148
E. faecalis RsiV    VNIDVPKIQTSQESSVADTLNKKYLKEAQTEFQQVKGQLFDGS-----R 144
    :. . * : . :. : : :* . :. :. :. . .

B. subtilis RsiV      LSIYSDYETVTDTPDLLSIRRNIETTQASSYTQSRYITIDKKN DILLTLK 189
C. difficile RsiV    KLSLSYSVKNNSKKFLSIEMTKNEIEASSYVSKVHYTIDKKRQIVLTLTP 198
E. faecalis RsiV    VSVTGDYEKVVDDRRFLVVKRTFTEIKGSSATTTKYDTIDKRANVVVSLP 194
    * : *. . : : * :. . : ** . . : **** : :. :. : *

B. subtilis RsiV      SLFKDERYIKVISQNIKEQMKGQMKEDPNKIYWLT----DEDAEPFKTIL 235
C. difficile RsiV    MLFKDDKYIKVISDNIKEQMREQMKDSTKSYFIDQK-KDLPVEDFKTIN 247
E. faecalis RsiV    LIFKNDFYIDVISSEIKQQISDQMKNDSNKIYWSEKEDAPSDVQPFKKIK 244
    :***: **.***.:***: :***:*..* * : . : **.*

B. subtilis RsiV      PDQTFYITEDHKLVISFDEYEVAPGYMGVTEFTIPTGVISNLLVGERYIR 285
C. difficile RsiV    KYQDFYFNKNEDLVICFDEYEVAPGYMGAVEFVIPIYKVIKDL----- 289
E. faecalis RsiV    KDQPFYINEKHQLVIVFPQGEIAPYYMGTPEFVIPNQVIENELAAPNYLK 294
    * ** :. :. . ** * : * : ** ** . ** . ** ** :
  
```

**B.**

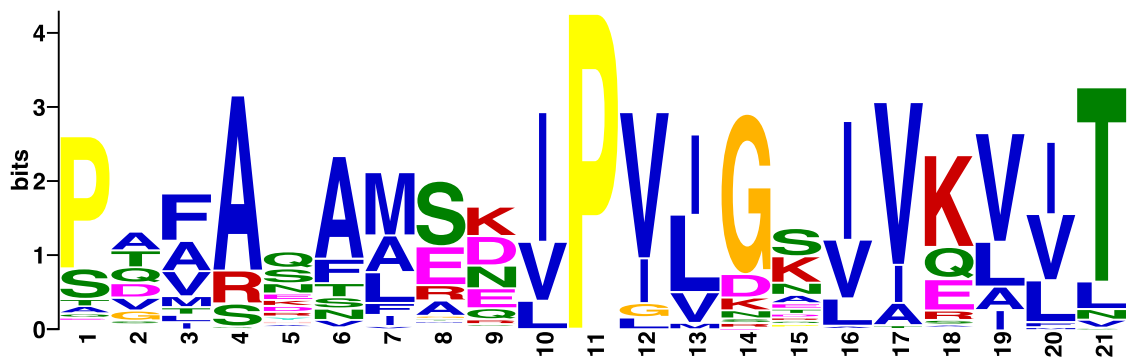

Supplement: pgen.1004643.s002.pdf [file pgen.1004643.s002.pdf]
