# Supplementary material for: Evidence of a Bacterial Receptor for Lysozyme: Binding of Lysozyme to the Anti-σ Factor RsiV Controls Activation of the ECF σ Factor σV
Source: PubMed Central journal article supplement (PMC4183432; doi:10.1371/journal.pgen.1004643), 2014-10-02

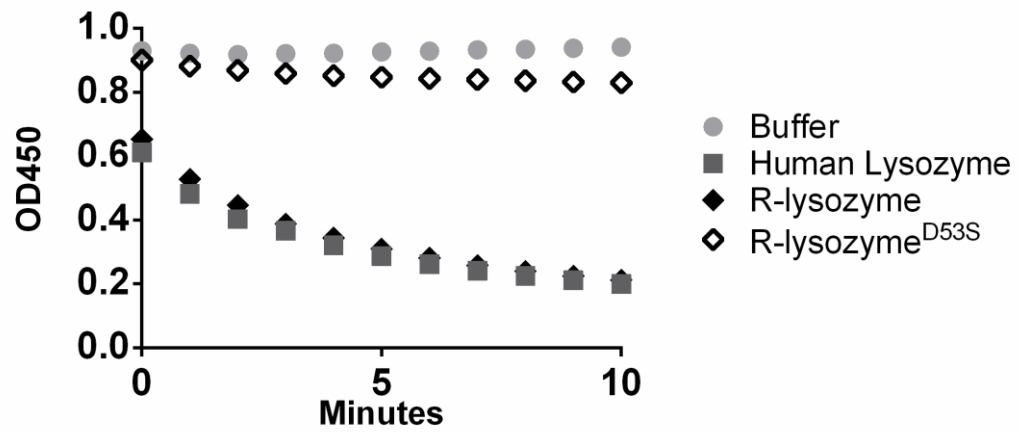

Supplement: pgen.1004643.s006.pdf [file pgen.1004643.s006.pdf]
